# Supplementary material for: Integrated transcriptomic analysis reveals a lncRNA-miRNA-TF-mRNA regulatory network underlying quercetin’s anti-hepatocellular carcinoma effects
Source: Research Square preprint supplement (doi:10.21203/rs.3.rs-8329255/v1), 2025-12-22
Supplement: Supplementary file 1 [file f162a331c44da5f32144c182.docx]

Supplementary Table 1 Top ten most significantly altered transcripts.

| Type | Name | log2FC | *q*-value |
| --- | --- | --- | --- |
| DElncRNA | DRD5P2 | 8.18 | 8.98E-10 |
| LOC101060524 | 8.18 | 8.98E-10 |
| LOC102724908 | 7.33 | 6.72E-08 |
| LOC105377468 | 7.31 | 2.43E-07 |
| LOC105374616 | -7.26 | 5.22E-08 |
| LINC01293 | 7.19 | 9.03E-07 |
| SLC26A9-AS1 | 7.08 | 8.71E-07 |
| LINC02167 | 7.03 | 1.10E-06 |
| LOC105378620 | 6.77 | 5.20E-06 |
| LOC107986820 | 6.56 | 3.72E-12 |

| DEmRNA | H2AC19 | -23.16 | 4.24E-08 |
| --- | --- | --- | --- |
| CYB5R2 | 7.64 | 7.72E-09 |
| HBA2 | 7.43 | 1.04E-07 |
| VNN1 | 7.33 | 2.09E-07 |
| OR4F6 | 7.06 | 9.41E-07 |
| CYP4F11 | 6.96 | 1.79E-18 |
| FCRLA | 6.80 | 4.38E-06 |
| OR4F15 | 6.32 | 6.87E-05 |
| PRSS57 | 6.27 | 7.42E-05 |
| USP17L2 | 6.14 | 1.49E-04 |
| DEmiRNA | hsa-miR-519c-5p | -11.26 | 1.65E-06 |
| hsa-miR-487a-3p | 8.29 | 6.33E-03 |
| hsa-miR-423-5p | -8.01 | 7.40E-03 |
| hsa-miR-1246 | 4.17 | 9.71E-179 |
| hsa-miR-675-5p | -3.08 | 4.65E-29 |
| hsa-miR-449a | 2.96 | 3.13E-38 |
| hsa-let-7c-3p | -2.92 | 3.30E-25 |
| hsa-miR-190b-5p | 2.85 | 2.50E-44 |
| hsa-miR-146a-5p | 2.76 | 4.43E-13 |
| hsa-miR-1260b | -2.73 | 1.86E-03 |
| hsa-miR-3911 | -2.64 | 3.66E-03 |
| hsa-miR-425-3p | -2.52 | 6.42E-25 |

Supplementary Table 2 Details of the five modules.

| Module | Score | Number of nodes | Number of edges | Component |
| --- | --- | --- | --- | --- |
| 1 | 10 | 11 | 100 | *H2AC21*，*H2BC9*，*H2AC6*，*H2BC7*，*H2AC19*，*H4C9*，*H2BC14*，*H2AC20*，*H2AC14*，*H2AC13*，*H2BC3* |
| 2 | 7 | 7 | 42 | *RSAD2*，*MX2*，*IFITM1*，*IFIT1*，*IFITM3*，*IFITM2*，*BST2* |
| 3 | 5 | 5 | 20 | *KIF20A*，*PLK1*，*AURKA*，*CDC20*，*CCNB1* |
| 4 | 4.86 | 8 | 34 | *JUN*，*CSF2*，*CSF1*，*ITGAM*，*IL1A*，*CCL20*，*IL7*，*TNF* |
| 5 | 4 | 4 | 12 | *H3C10*，*H2BC13*，*H2BC11*，*H2AC4* |
